# Supplementary material
Source: PubMed Central journal article supplement (PMC2844854)
Supplement: NIHMS66083-supplement-1.pdf [file NIHMS66083-supplement-1.pdf]

Supplementary Figure 1. The helical population of each rotamer by helical position.

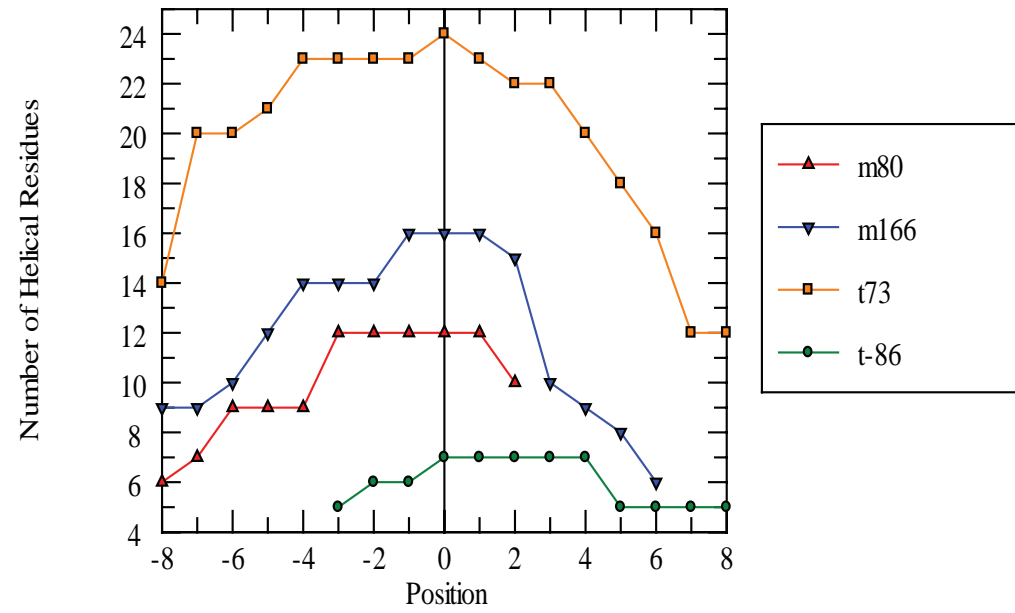

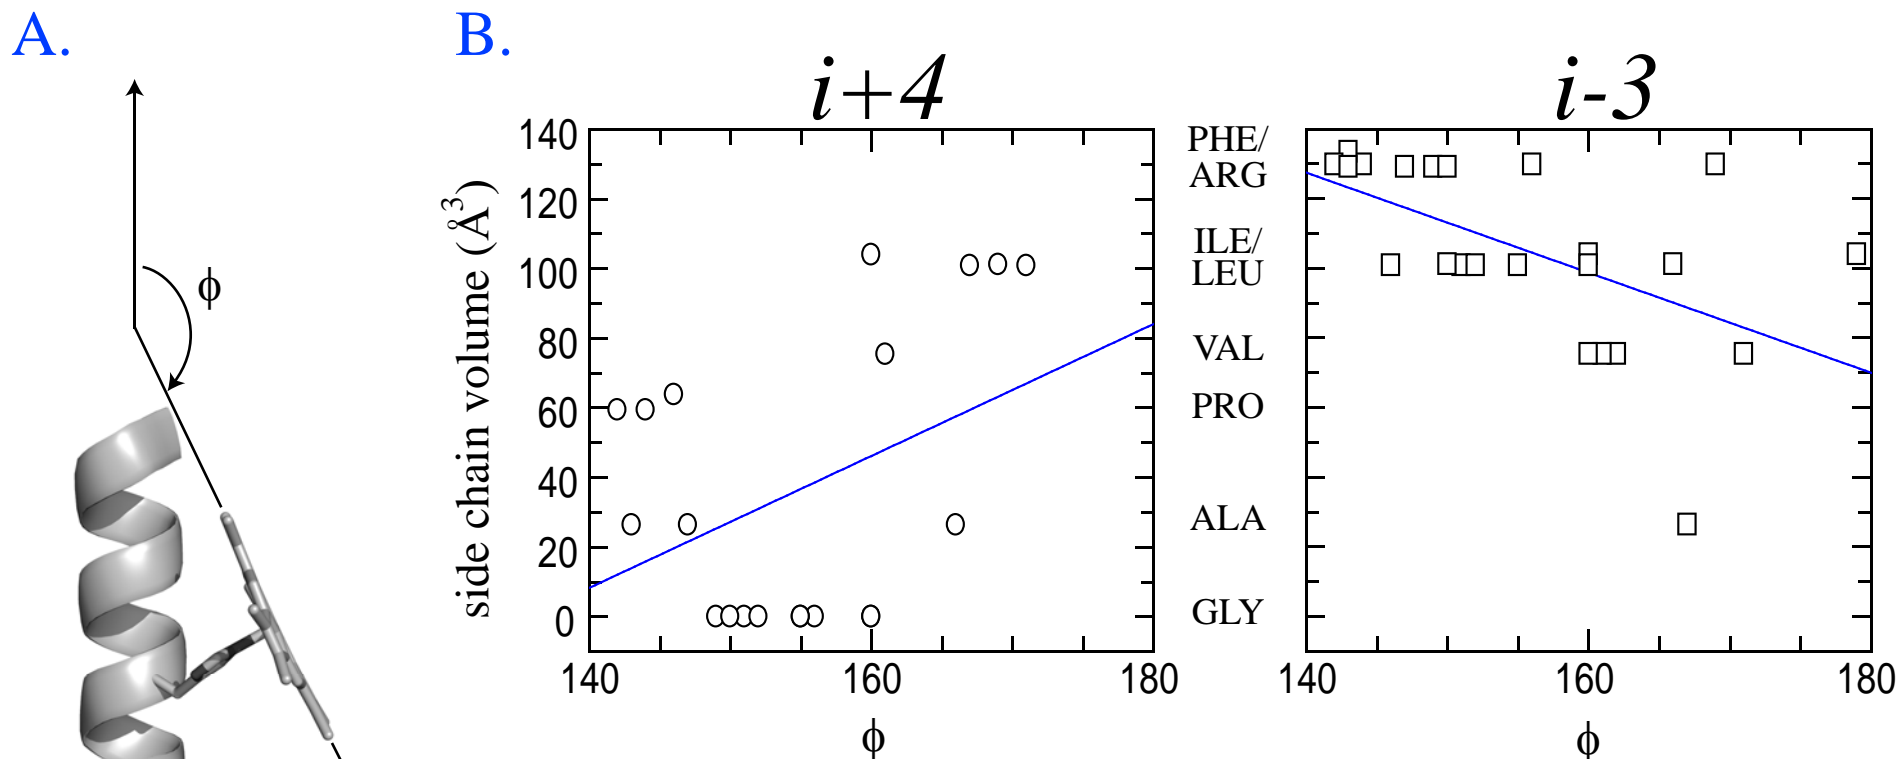

**Supplementary Figure 2.** Porphyrin ring tilt angle and its dependence on selected side chain volumes in the **t73** rotamer. A) With the helix aligned upright, the protein is rotated around the helical axis until the porphyrin macrocycle is normal to the observer. The tilt angle is defined as the angle formed between the helix vector and the porphyrin vector, which begins at the point of closest approach to the helix. B) Dependence of the tilt angle on side chain volumes at *i+4* and *i-3* in the database. Lines drawn are linear fits of the data. Side chain volumes taken from Hackel *et al* Biophysical Chemistry **82** (1999) pp 35-50

**Supplementary Table 1.** The non redundant dataset of heme proteins discussed in this paper, sorted by ligand histidine rotamer. Asterisk-labeled *b*-type proteins are the non cysteine containing side of a *c*-type heme.

| PDB ID | Residue Number | Chain | Rotamer | Paired Rotamer | Paired Chain | Paired Residue Number | Heme Type        | Position -3 for t73 | Position 4 for t73 | Position 8 for t73 | Tilt Angle | Protein                                                                 | Organism                            |
|--------|----------------|-------|---------|----------------|--------------|-----------------------|------------------|---------------------|--------------------|--------------------|------------|-------------------------------------------------------------------------|-------------------------------------|
| 1EZV   | 183            | C     | t73     | t73            | C            | 82                    | <i>b</i> -type   | PHE                 | PRO                | ALA                | 144        | Cytochrome <i>b</i>                                                     | <i>Saccharomyces Cerevisiae</i>     |
| 1EZV   | 96             | C     | t73     | t73            | C            | 197                   | <i>b</i> -type   | MET                 | GLY                | Non helical        | 160        | Cytochrome <i>b</i>                                                     | <i>Saccharomyces Cerevisiae</i>     |
| 1EZV   | 197            | C     | t73     | t73            | C            | 96                    | <i>b</i> -type   | VAL                 | LEU                | Non helical        | 171        | Cytochrome <i>b</i>                                                     | <i>Saccharomyces Cerevisiae</i>     |
| 1EZV   | 82             | C     | t73     | t73            | C            | 183                   | <i>b</i> -type   | ARG                 | ALA                | PHE                | 147        | Cytochrome <i>b</i>                                                     | <i>Saccharomyces Cerevisiae</i>     |
| 1GU2   | 95             | A     | t73     |                |              |                       | <i>b</i> -type * | PHE                 | ILE                | Non helical        | 169        | Cytochrome <i>c'</i>                                                    | <i>Methylophilus Mehtylotrophus</i> |
| 1KQF   | 155            | C     | t73     | t73            | C            | 57                    | <i>b</i> -type   | LEU                 | GLY                | ILE                | 151        | Formate Dehydrogenase, Cytochrome <i>b</i> <sub>556</sub> (FDN) Subunit | <i>Drosophila Melanogaster</i>      |
| 1KQF   | 169            | C     | t73     | t-86           | C            | 18                    | <i>b</i> -type   | ILE                 | ALA                | Non helical        | 166        | Formate Dehydrogenase, Cytochrome <i>b</i> <sub>556</sub> (FDN) Subunit | <i>Drosophila Melanogaster</i>      |
| 1KQF   | 57             | C     | t73     | t73            | C            | 155                   | <i>b</i> -type   | ARG                 | GLY                | PHE                | 149        | Formate Dehydrogenase, Cytochrome <i>b</i> <sub>556</sub> (FDN) Subunit | <i>Drosophila Melanogaster</i>      |
| 1M56   | 419            | A     | t73     |                |              |                       | <i>a</i> -type   | VAL                 | Non helical        | Non helical        | 162        | Cytochrome <i>c</i> Oxidase                                             | <i>Rhodobacter Sphaeroides</i>      |

|      |     |   |     |     |   |     |        |             |             |             |     |                                                             |                                |
|------|-----|---|-----|-----|---|-----|--------|-------------|-------------|-------------|-----|-------------------------------------------------------------|--------------------------------|
| 1NEN | 71  | D | t73 | t73 | C | 84  | b-type | ILE         | GLY         | VAL         | 150 | Succinate Dehydrogenase Hydrophobic Membrane Anchor Protein | <i>Drosophila Melanogaster</i> |
| 1NEN | 84  | C | t73 | t73 | D | 71  | b-type | LEU         | GLY         | MET         | 152 | Succinate Dehydrogenase Cytochrome b <sub>556</sub> subunit | <i>Drosophila Melanogaster</i> |
| 1V54 | 376 | A | t73 |     |   |     | a-type | VAL         | VAL         | Non helical | 161 | Cytochrome c oxidase polypeptide I                          | <i>Bos Taurus</i>              |
| 1V54 | 61  | A | t73 | m80 | A | 378 | a-type | VAL         | MET         | Non helical | 160 | Cytochrome c oxidase polypeptide I                          | <i>Bos Taurus</i>              |
| 1VF5 | 187 | A | t73 | t73 | A | 86  | b-type | TYR         | Non helical | Non helical | 143 | Cytochrome b 6F Complex                                     | <i>Mastigocladus Laminosus</i> |
| 1VF5 | 86  | A | t73 | t73 | A | 187 | b-type | ARG         | Non helical | Non helical | 150 | Cytochrome b 6F Complex                                     | <i>Mastigocladus Laminosus</i> |
| 1VF5 | 100 | A | t73 |     |   |     | b-type | MET         | Non helical | Non helical | 179 | Cytochrome b 6F Complex                                     | <i>Mastigocladus Laminosus</i> |
| 1XME | 72  | A | t73 |     |   |     | b-type | LEU         | ASN         | PHE         | 146 | Cytochrome c oxidase polypeptide I                          | <i>Thermus Thermophilus</i>    |
| 1Y5N | 187 | C | t73 | m80 | C | 66  | b-type | PHE         | GLY         | PHE         | 156 | Respiratory nitrate reductase 1 gamma chain                 | <i>Drosophila Melanogaster</i> |
| 1ZOY | 101 | C | t73 | t73 | D | 79  | b-type | LEU         | GLY         | LEU         | 155 | Large cytochrome binding protein                            | <i>Sus Scrofa</i>              |
| 1ZOY | 79  | D | t73 | t73 | C | 101 | b-type | Non helical | GLY         | VAL         | 155 | Small cytochrome binding protein                            | <i>Sus Scrofa</i>              |
| 2A06 | 97  | C | t73 | t73 | C | 196 | b-type | LEU         | GLY         | Non helical | 160 | Cytochrome bc1 Complex with Stigmatellin Bound              | <i>Bos Taurus</i>              |

|      |     |   |      |      |   |     |                 |     |     |             |     |                                                                                                                   |                                |
|------|-----|---|------|------|---|-----|-----------------|-----|-----|-------------|-----|-------------------------------------------------------------------------------------------------------------------|--------------------------------|
| 2A06 | 182 | C | t73  | t73  | C | 83  | <i>b</i> -type  | PHE | PRO | MET         | 142 | Cytochrome <i>bc</i> 1 Complex with Stigmatellin Bound                                                            | <i>Bos Taurus</i>              |
| 2A06 | 83  | C | t73  | t73  | C | 182 | <i>b</i> -type  | ARG | ALA | PHE         | 143 | Cytochrome <i>bc</i> 1 Complex with Stigmatellin Bound                                                            | <i>Bos Taurus</i>              |
| 2A06 | 196 | C | t73  | t73  | C | 97  | <i>b</i> -type  | ALA | LEU | Non helical | 167 | Cytochrome <i>bc</i> 1 Complex with Stigmatellin Bound                                                            | <i>Bos Taurus</i>              |
| 1EW0 | 194 | A | t-86 |      |   |     | <i>b</i> -type  |     |     |             | 156 | Cruzain                                                                                                           | <i>Trypanosoma Cruzi</i>       |
| 1H29 | 159 | B | t-86 |      |   |     | <i>b</i> -type* |     |     |             | 150 | High-Molecular-Weight Cytochrome <i>c</i> Formate Dehydrogenase, Cytochrome <i>b</i> <sub>556</sub> (FDN) Subunit | <i>Desulfovibrio Vulgaris</i>  |
| 1KQF | 18  | C | t-86 | t73  | C | 169 | <i>b</i> -type  |     |     |             | 150 | Putative Hemoglobin                                                                                               | <i>Drosophila Melanogaster</i> |
| 1MWB | 46  | A | t-86 | m166 | A | 70  | <i>b</i> -type  |     |     |             | 154 | Heme pas sensor protein                                                                                           | <i>Synechocystis Sp</i>        |
| 1V9Y | 77  | A | t-86 |      |   |     | <i>b</i> -type  |     |     |             | 155 | Heme Oxygenase 1                                                                                                  | <i>Drosophila Melanogaster</i> |
| 1WE1 | 17  | A | t-86 |      |   |     | <i>b</i> -type  |     |     |             | 152 | Hemoglobin                                                                                                        | <i>Synechocystis Sp</i>        |
| 2BK9 | 61  | A | t-86 |      |   |     | <i>b</i> -type  |     |     |             | 150 | Hemoglobin                                                                                                        | <i>Drosophila Melanogaster</i> |
| 1BBH | 125 | A | m166 |      |   |     | <i>c</i> -type  |     |     |             | 17  | Na Cytochrome <i>c</i>                                                                                            | <i>Chromatium Vinosum</i>      |
| 1FGJ | 279 | A | m166 |      |   |     | <i>b</i> -type* |     |     |             | 35  | Hydroxylamine Oxidoreductase                                                                                      | <i>Nitrosomonas Europaea</i>   |
| 1FT5 | 27  | A | m166 |      |   |     | <i>b</i> -type* |     |     |             | 10  | Cytochrome <i>c</i> <sub>554</sub>                                                                                | <i>Nitrosomonas Europaea</i>   |

|      |     |   |      |      |   |     |                 |     |                                              |                                    |
|------|-----|---|------|------|---|-----|-----------------|-----|----------------------------------------------|------------------------------------|
| 1H29 | 516 | B | m166 |      |   |     | <i>b</i> -type* | 169 | High-Molecular-Weight<br>Cytochrome <i>c</i> | <i>Desulfovibrio Vulgaris</i>      |
| 1H29 | 111 | B | m166 |      |   |     | <i>b</i> -type* | 3   | High-Molecular-Weight<br>Cytochrome <i>c</i> | <i>Desulfovibrio Vulgaris</i>      |
| 1H29 | 222 | B | m166 |      |   |     | <i>b</i> -type* | 18  | High-Molecular-Weight<br>Cytochrome <i>c</i> | <i>Desulfovibrio Vulgaris</i>      |
| 1H29 | 523 | B | m166 |      |   |     | <i>c</i> -type  | 22  | High-Molecular-Weight<br>Cytochrome <i>c</i> | <i>Desulfovibrio Vulgaris</i>      |
| 1H29 | 229 | B | m166 | m80  | B | 162 | <i>c</i> -type  | 22  | High-Molecular-Weight<br>Cytochrome <i>c</i> | <i>Desulfovibrio Vulgaris</i>      |
| 1H29 | 353 | B | m166 | m80  | B | 301 | <i>c</i> -type  | 23  | High-Molecular-Weight<br>Cytochrome <i>c</i> | <i>Desulfovibrio Vulgaris</i>      |
| 1H29 | 118 | B | m166 | m80  | B | 69  | <i>c</i> -type  | 25  | High-Molecular-Weight<br>Cytochrome <i>c</i> | <i>Desulfovibrio Vulgaris</i>      |
| 1J0P | 83  | A | m166 |      |   |     | <i>c</i> -type  | 23  | Cyochrome <i>c</i> <sub>3</sub><br>Y43L      | <i>Desulfovibrio Vulgaris</i>      |
| 1MWB | 70  | A | m166 | t-86 | A | 46  | <i>b</i> -type  | 160 | Putative<br>Hemoglobin<br>Heme-based         | <i>Synechocystis Sp</i>            |
| 1OR6 | 123 | A | m166 |      |   |     | <i>b</i> -type  | 12  | aerotactic<br>transducer hemAT               | <i>Bacillus Subtilis</i>           |
| 256B | 102 | A | m166 |      |   |     | <i>b</i> -type  | 12  | NA Cytochrome<br><i>b</i> <sub>562</sub>     | <i>Drosophila Melanogaster</i>     |
| 2CCY | 122 | A | m166 |      |   |     | <i>c</i> -type  | 156 | Ferricytochrome<br><i>c'</i>                 | <i>Rhodospirillum Molischianum</i> |
| 4VHB | 85  | A | m166 |      |   |     | <i>b</i> -type  | 162 | Hemoglobin                                   | <i>Vitreoscilla Stercoraria</i>    |
| 1H29 | 162 | B | m80  |      |   |     | <i>b</i> -type* | 156 | High-Molecular-Weight<br>Cytochrome <i>c</i> | <i>Desulfovibrio Vulgaris</i>      |

|      |     |   |     |      |   |     |                 |     |                                                     |                                 |
|------|-----|---|-----|------|---|-----|-----------------|-----|-----------------------------------------------------|---------------------------------|
| 1H29 | 69  | B | m80 | m166 | B | 118 | <i>b</i> -type* | 154 | High-Molecular-Weight<br>Cytochrome <i>c</i>        | <i>Desulfovibrio Vulgaris</i>   |
| 1H29 | 301 | B | m80 | m166 | B | 353 | <i>b</i> -type* | 157 | High-Molecular-Weight<br>Cytochrome <i>c</i>        | <i>Desulfovibrio Vulgaris</i>   |
| 1IRD | 87  | A | m80 |      |   |     | <i>b</i> -type  | 166 | Hemoglobin Beta Chain                               | <i>Homo Sapiens</i>             |
| 1IRD | 292 | B | m80 |      |   |     | <i>b</i> -type  | 169 | Hemoglobin Beta Chain                               | <i>Homo Sapiens</i>             |
| 1IT2 | 103 | A | m80 |      |   |     | <i>b</i> -type  | 165 | Hemoglobin                                          | <i>Eptatretus Burgeri</i>       |
| 1ITH | 94  | B | m80 |      |   |     | <i>b</i> -type  | 165 | NA Hemoglobin (Cyano Met)                           | <i>Urechis Caupo</i>            |
| 1PBY | 126 | A | m80 |      |   |     | <i>b</i> -type  | 172 | Quinohemoprotein amine dehydrogenase 60 kDa subunit | <i>Paracoccus Denitrificans</i> |
| 1V54 | 378 | A | m80 | t73  | A | 61  | <i>a</i> -type  | 165 | Cytochrome <i>c</i> oxidase polypeptide I           | <i>Bos Taurus</i>               |
| 1Y5N | 66  | C | m80 | t73  | C | 187 | <i>b</i> -type  | 12  | Respiratory nitrate reductase 1 gamma chain         | <i>Drosophila Melanogaster</i>  |
| 1Y5N | 56  | C | m80 |      |   |     | <i>b</i> -type  | 160 | Respiratory nitrate reductase 1 gamma chain         | <i>Drosophila Melanogaster</i>  |
| 3SDH | 101 | B | m80 |      |   |     | <i>b</i> -type  | 165 | Hemoglobin I (Homodimer) (Carbon-Monoxy)            | <i>Scapharca Inaequalvis</i>    |

## Supplementary Table2. Heme Propensity

## A. All Helices

|     |     |     |     |     |      |     |     |      |     |     |     |     |      |     |      |     |     |
|-----|-----|-----|-----|-----|------|-----|-----|------|-----|-----|-----|-----|------|-----|------|-----|-----|
| ALA | 1.1 | 0.5 | 0.9 | 1.3 | 0.3  | 0.9 | 1.2 | 1.6  | 0.0 | 1.3 | 0.8 | 1.1 | 1.9  | 0.4 | 0.3  | 0.0 | 0.7 |
| ARG | 0.0 | 0.8 | 0.9 | 1.6 | 0.7  | 2.1 | 1.0 | 0.3  | 0.0 | 0.3 | 1.1 | 0.9 | 0.0  | 0.4 | 1.9  | 0.6 | 1.4 |
| ASN | 0.0 | 0.9 | 1.4 | 0.6 | 0.0  | 1.3 | 0.9 | 0.6  | 0.0 | 0.5 | 2.9 | 0.7 | 0.9  | 0.0 | 1.0  | 3.3 | 0.0 |
| ASP | 0.0 | 0.0 | 0.0 | 1.3 | 0.3  | 0.0 | 0.9 | 0.0  | 0.0 | 1.1 | 2.0 | 0.5 | 0.0  | 0.0 | 0.0  | 0.0 | 1.1 |
| CYS | 0.0 | 0.0 | 0.0 | 0.0 | 17.9 | 0.0 | 0.0 | 11.8 | 0.0 | 3.5 | 0.0 | 4.9 | 0.0  | 0.0 | 10.2 | 0.0 | 0.0 |
| GLU | 0.0 | 0.0 | 1.1 | 0.0 | 0.2  | 0.2 | 0.8 | 0.0  | 0.0 | 0.7 | 1.2 | 0.6 | 0.3  | 1.2 | 0.5  | 0.0 | 0.5 |
| GLN | 0.0 | 0.0 | 1.4 | 0.9 | 0.0  | 0.3 | 0.4 | 0.4  | 0.0 | 0.9 | 0.8 | 0.5 | 0.0  | 1.2 | 0.0  | 1.6 | 0.0 |
| GLY | 2.2 | 2.9 | 0.0 | 1.1 | 1.2  | 0.0 | 2.0 | 0.4  | 0.0 | 1.3 | 3.9 | 1.7 | 7.5  | 3.3 | 1.9  | 0.0 | 0.0 |
| HIS | 0.0 | 2.9 | 0.0 | 2.1 | 0.0  | 1.6 | 0.7 | 0.0  | 1.0 | 0.0 | 2.9 | 0.7 | 0.0  | 2.6 | 1.2  | 6.9 | 0.0 |
| ILE | 2.6 | 3.1 | 0.4 | 0.9 | 2.4  | 1.1 | 0.9 | 1.3  | 0.0 | 0.5 | 0.2 | 0.9 | 2.1  | 3.4 | 2.9  | 2.2 | 0.6 |
| LEU | 0.6 | 1.2 | 0.8 | 0.9 | 1.1  | 0.8 | 0.5 | 1.2  | 0.0 | 0.8 | 0.2 | 1.1 | 0.7  | 0.6 | 0.0  | 0.6 | 0.3 |
| LYS | 0.7 | 0.5 | 3.2 | 0.9 | 1.1  | 1.6 | 0.7 | 1.4  | 0.0 | 1.2 | 1.2 | 0.3 | 0.0  | 1.0 | 0.0  | 0.0 | 0.6 |
| MET | 3.1 | 1.2 | 1.7 | 2.1 | 2.6  | 2.1 | 1.3 | 2.8  | 0.0 | 1.9 | 1.4 | 0.8 | 2.7  | 2.0 | 2.1  | 0.0 | 5.0 |
| PHE | 1.0 | 1.9 | 1.2 | 1.6 | 1.8  | 3.0 | 0.4 | 1.6  | 0.0 | 1.4 | 1.2 | 1.2 | 1.2  | 1.9 | 1.4  | 3.4 | 7.9 |
| PRO | 0.0 | 0.8 | 0.0 | 0.0 | 0.8  | 0.0 | 1.4 | 0.0  | 0.0 | 3.6 | 0.0 | 0.0 | 12.2 | 0.0 | 0.0  | 0.0 | 0.0 |
| SER | 0.7 | 0.0 | 0.5 | 0.6 | 1.2  | 1.2 | 2.7 | 0.8  | 0.0 | 0.9 | 0.0 | 0.5 | 0.0  | 1.9 | 1.8  | 0.0 | 0.0 |
| THR | 3.2 | 0.0 | 2.1 | 1.7 | 0.4  | 0.4 | 1.2 | 0.0  | 0.0 | 1.6 | 1.8 | 0.5 | 0.0  | 0.7 | 1.4  | 0.0 | 1.1 |
| TRP | 0.0 | 1.8 | 4.2 | 0.0 | 0.0  | 0.0 | 0.0 | 0.0  | 0.0 | 0.9 | 2.9 | 1.2 | 0.0  | 0.0 | 3.5  | 2.2 | 0.0 |
| TYR | 3.5 | 2.1 | 2.2 | 1.3 | 1.7  | 0.8 | 1.9 | 2.5  | 0.0 | 1.2 | 0.5 | 2.6 | 0.0  | 0.0 | 0.9  | 2.4 | 0.0 |
| VAL | 1.7 | 1.5 | 0.7 | 0.9 | 1.0  | 2.5 | 1.2 | 0.3  | 0.0 | 1.0 | 0.9 | 1.9 | 1.4  | 0.0 | 0.0  | 1.6 | 2.2 |
|     | P-8 | P-7 | P-6 | P-5 | P-4  | P-3 | P-2 | P-1  | P0  | P1  | P2  | P3  | P4   | P5  | P6   | P7  | P8  |



B.t73

|     |     |     |     |     |     |     |     |     |     |     |     |     |      |     |     |     |      |
|-----|-----|-----|-----|-----|-----|-----|-----|-----|-----|-----|-----|-----|------|-----|-----|-----|------|
| ALA | 0.0 | 0.5 | 0.5 | 0.7 | 0.7 | 0.4 | 1.1 | 1.5 | 0.0 | 1.9 | 0.7 | 0.8 | 1.4  | 0.4 | 0.5 | 0.0 | 0.7  |
| ARG | 0.0 | 0.0 | 1.0 | 2.6 | 0.0 | 3.4 | 0.8 | 0.0 | 0.0 | 0.7 | 0.0 | 0.6 | 0.0  | 0.0 | 1.9 | 0.0 | 0.0  |
| ASN | 0.0 | 0.0 | 1.5 | 0.0 | 0.0 | 0.0 | 0.0 | 0.0 | 0.0 | 0.0 | 5.6 | 1.4 | 1.9  | 0.0 | 0.0 | 0.0 | 0.0  |
| ASP | 0.0 | 0.0 | 0.0 | 1.0 | 0.0 | 0.0 | 0.0 | 0.0 | 0.0 | 0.0 | 0.0 | 1.0 | 0.0  | 0.0 | 0.0 | 0.0 | 0.0  |
| CYS | 0.0 | 0.0 | 0.0 | 0.0 | 4.3 | 0.0 | 0.0 | 0.0 | 0.0 | 3.1 | 0.0 | 0.0 | 0.0  | 0.0 | 0.0 | 0.0 | 0.0  |
| GLU | 0.0 | 0.0 | 0.6 | 0.0 | 0.5 | 0.0 | 0.0 | 0.0 | 0.0 | 0.0 | 0.0 | 0.0 | 0.0  | 0.0 | 0.0 | 0.0 | 0.0  |
| GLN | 0.0 | 0.0 | 2.0 | 0.9 | 0.0 | 0.0 | 0.0 | 0.0 | 0.0 | 0.0 | 0.0 | 0.0 | 0.0  | 0.0 | 0.0 | 3.2 | 0.0  |
| GLY | 3.0 | 3.2 | 0.0 | 0.0 | 2.5 | 0.0 | 0.0 | 0.0 | 0.0 | 2.3 | 2.0 | 2.3 | 15.0 | 0.0 | 1.8 | 0.0 | 0.0  |
| HIS | 0.0 | 0.0 | 0.0 | 2.2 | 0.0 | 0.0 | 0.0 | 0.0 | 1.0 | 0.0 | 5.5 | 0.0 | 0.0  | 5.0 | 0.0 | 5.6 | 0.0  |
| ILE | 5.3 | 4.8 | 0.8 | 2.0 | 3.0 | 1.3 | 1.6 | 2.7 | 0.0 | 0.0 | 0.6 | 0.9 | 0.8  | 4.9 | 4.6 | 4.5 | 1.2  |
| LEU | 0.6 | 1.3 | 0.8 | 0.8 | 0.4 | 1.9 | 1.0 | 2.0 | 0.0 | 0.9 | 0.6 | 1.1 | 0.7  | 0.8 | 0.0 | 1.3 | 0.6  |
| LYS | 0.0 | 0.0 | 0.0 | 0.0 | 0.0 | 0.0 | 0.0 | 0.9 | 0.0 | 0.0 | 0.0 | 0.6 | 0.0  | 0.0 | 0.0 | 0.0 | 0.0  |
| MET | 3.2 | 2.2 | 1.8 | 4.5 | 3.8 | 3.3 | 3.1 | 7.0 | 0.0 | 3.4 | 1.8 | 1.5 | 1.8  | 3.9 | 2.1 | 0.0 | 5.0  |
| PHE | 2.0 | 2.3 | 2.5 | 3.5 | 2.6 | 4.7 | 0.9 | 1.0 | 0.0 | 2.8 | 2.0 | 2.4 | 0.0  | 3.8 | 2.7 | 3.4 | 11.3 |
| PRO | 0.0 | 1.5 | 0.0 | 0.0 | 1.8 | 0.0 | 0.0 | 0.0 | 0.0 | 4.8 | 0.0 | 0.0 | 24.4 | 0.0 | 0.0 | 0.0 | 0.0  |
| SER | 0.0 | 0.0 | 0.0 | 0.0 | 1.7 | 0.0 | 2.2 | 0.0 | 0.0 | 0.0 | 0.0 | 1.1 | 0.0  | 2.5 | 0.0 | 0.0 | 0.0  |
| THR | 4.0 | 0.0 | 2.2 | 1.2 | 0.0 | 0.0 | 2.9 | 0.0 | 0.0 | 1.1 | 0.0 | 0.0 | 0.0  | 0.0 | 1.3 | 0.0 | 0.0  |
| TRP | 0.0 | 0.0 | 8.7 | 0.0 | 0.0 | 0.0 | 0.0 | 0.0 | 0.0 | 0.0 | 7.4 | 2.5 | 0.0  | 0.0 | 6.7 | 0.0 | 0.0  |
| TYR | 2.4 | 3.8 | 3.0 | 1.4 | 3.8 | 1.8 | 3.4 | 2.5 | 0.0 | 1.0 | 1.2 | 2.6 | 0.0  | 0.0 | 1.7 | 0.0 | 0.0  |
| VAL | 1.1 | 1.4 | 1.5 | 0.7 | 1.4 | 2.6 | 1.2 | 0.7 | 0.0 | 1.9 | 1.8 | 2.3 | 0.6  | 0.0 | 0.0 | 1.6 | 2.9  |
|     | P-8 | P-7 | P-6 | P-5 | P-4 | P-3 | P-2 | P-1 | P0  | P1  | P2  | P3  | P4   | P5  | P6  | P7  | P8   |

## C.t73 bis-histidine

|     |     |     |      |     |     |     |     |      |     |     |      |     |      |     |     |     |     |
|-----|-----|-----|------|-----|-----|-----|-----|------|-----|-----|------|-----|------|-----|-----|-----|-----|
| ALA | 0.0 | 0.6 | 0.6  | 1.0 | 0.5 | 0.6 | 1.7 | 0.6  | 0.0 | 2.3 | 1.0  | 1.1 | 1.4  | 0.0 | 0.7 | 0.0 | 0.8 |
| ARG | 0.0 | 0.0 | 1.3  | 3.6 | 0.0 | 5.2 | 0.0 | 0.0  | 0.0 | 1.1 | 0.0  | 0.9 | 0.0  | 0.0 | 2.5 | 0.0 | 0.0 |
| ASN | 0.0 | 0.0 | 0.0  | 0.0 | 0.0 | 0.0 | 0.0 | 0.0  | 0.0 | 0.0 | 5.5  | 2.0 | 0.0  | 0.0 | 0.0 | 0.0 | 0.0 |
| ASP | 0.0 | 0.0 | 0.0  | 0.0 | 0.0 | 0.0 | 0.0 | 0.0  | 0.0 | 0.0 | 0.0  | 0.0 | 0.0  | 0.0 | 0.0 | 0.0 | 0.0 |
| CYS | 0.0 | 0.0 | 0.0  | 0.0 | 6.6 | 0.0 | 0.0 | 0.0  | 0.0 | 0.0 | 0.0  | 0.0 | 0.0  | 0.0 | 0.0 | 0.0 | 0.0 |
| GLU | 0.0 | 0.0 | 0.0  | 0.0 | 0.0 | 0.0 | 0.0 | 0.0  | 0.0 | 0.0 | 0.0  | 0.0 | 0.0  | 0.0 | 0.0 | 0.0 | 0.0 |
| GLN | 0.0 | 0.0 | 2.6  | 0.0 | 0.0 | 0.0 | 0.0 | 0.0  | 0.0 | 0.0 | 0.0  | 0.0 | 0.0  | 0.0 | 0.0 | 3.9 | 0.0 |
| GLY | 3.5 | 4.2 | 0.0  | 0.0 | 1.9 | 0.0 | 0.0 | 0.0  | 0.0 | 1.8 | 3.0  | 3.4 | 19.1 | 0.0 | 2.5 | 0.0 | 0.0 |
| HIS | 0.0 | 0.0 | 0.0  | 0.0 | 0.0 | 0.0 | 0.0 | 0.0  | 1.0 | 0.0 | 2.7  | 0.0 | 0.0  | 6.5 | 0.0 | 6.7 | 0.0 |
| ILE | 3.1 | 6.4 | 0.0  | 2.8 | 3.4 | 1.0 | 1.6 | 3.1  | 0.0 | 0.0 | 0.9  | 1.3 | 0.0  | 5.2 | 5.0 | 5.4 | 1.4 |
| LEU | 0.7 | 1.1 | 1.1  | 0.6 | 0.6 | 2.3 | 1.0 | 1.6  | 0.0 | 1.0 | 0.8  | 0.5 | 1.0  | 1.0 | 0.0 | 0.8 | 0.7 |
| LYS | 0.0 | 0.0 | 0.0  | 0.0 | 0.0 | 0.0 | 0.0 | 0.0  | 0.0 | 0.0 | 0.0  | 0.9 | 0.0  | 0.0 | 0.0 | 0.0 | 0.0 |
| MET | 3.7 | 0.0 | 2.3  | 6.4 | 2.9 | 2.5 | 4.7 | 10.7 | 0.0 | 2.6 | 2.7  | 0.0 | 0.0  | 2.5 | 2.7 | 0.0 | 6.0 |
| PHE | 2.4 | 3.1 | 3.4  | 3.3 | 3.9 | 3.6 | 1.4 | 1.5  | 0.0 | 1.4 | 1.5  | 3.5 | 0.0  | 3.2 | 1.8 | 4.1 | 8.2 |
| PRO | 0.0 | 2.0 | 0.0  | 0.0 | 2.7 | 0.0 | 0.0 | 0.0  | 0.0 | 7.3 | 0.0  | 0.0 | 34.9 | 0.0 | 0.0 | 0.0 | 0.0 |
| SER | 0.0 | 0.0 | 0.0  | 0.0 | 2.6 | 0.0 | 3.4 | 0.0  | 0.0 | 0.0 | 0.0  | 1.6 | 0.0  | 3.2 | 0.0 | 0.0 | 0.0 |
| THR | 4.7 | 0.0 | 2.9  | 1.7 | 0.0 | 0.0 | 0.0 | 0.0  | 0.0 | 1.7 | 0.0  | 0.0 | 0.0  | 0.0 | 0.0 | 0.0 | 0.0 |
| TRP | 0.0 | 0.0 | 11.6 | 0.0 | 0.0 | 0.0 | 0.0 | 0.0  | 0.0 | 0.0 | 10.9 | 3.6 | 0.0  | 0.0 | 4.5 | 0.0 | 0.0 |
| TYR | 2.8 | 0.0 | 2.0  | 1.9 | 1.9 | 2.8 | 5.3 | 3.9  | 0.0 | 1.6 | 0.0  | 0.0 | 0.0  | 0.0 | 2.3 | 0.0 | 0.0 |
| VAL | 1.3 | 0.9 | 1.0  | 0.0 | 1.1 | 1.0 | 0.0 | 1.1  | 0.0 | 2.0 | 0.9  | 2.2 | 0.0  | 0.0 | 0.0 | 0.0 | 3.5 |
|     | P-8 | P-7 | P-6  | P-5 | P-4 | P-3 | P-2 | P-1  | P0  | P1  | P2   | P3  | P4   | P5  | P6  | P7  | P8  |

## D.t-86

|     |     |     |      |     |      |      |     |     |     |      |      |      |
|-----|-----|-----|------|-----|------|------|-----|-----|-----|------|------|------|
| ALA | 0.0 | 1.4 | 4.3  | 0.0 | 1.2  | 0.0  | 2.4 | 0.0 | 0.0 | 0.0  | 0.0  | 1.6  |
| ARG | 3.9 | 6.3 | 0.0  | 0.0 | 0.0  | 2.3  | 1.9 | 0.0 | 2.8 | 6.0  | 0.0  | 3.4  |
| ASN | 0.0 | 0.0 | 0.0  | 0.0 | 0.0  | 0.0  | 0.0 | 0.0 | 0.0 | 0.0  | 7.9  | 0.0  |
| ASP | 0.0 | 0.0 | 0.0  | 0.0 | 3.2  | 0.0  | 0.0 | 0.0 | 0.0 | 0.0  | 0.0  | 0.0  |
| CYS | 0.0 | 0.0 | 12.7 | 0.0 | 0.0  | 0.0  | 0.0 | 0.0 | 0.0 | 15.8 | 0.0  | 0.0  |
| GLU | 0.0 | 0.0 | 0.0  | 0.0 | 0.0  | 2.5  | 0.0 | 1.9 | 0.0 | 0.0  | 0.0  | 0.0  |
| GLN | 3.7 | 0.0 | 0.0  | 0.0 | 2.6  | 0.0  | 0.0 | 0.0 | 4.3 | 0.0  | 0.0  | 0.0  |
| GLY | 0.0 | 0.0 | 0.0  | 0.0 | 0.0  | 12.7 | 0.0 | 0.0 | 0.0 | 0.0  | 0.0  | 0.0  |
| HIS | 0.0 | 0.0 | 0.0  | 1.0 | 0.0  | 0.0  | 4.4 | 0.0 | 0.0 | 7.5  | 0.0  | 0.0  |
| ILE | 0.0 | 0.0 | 0.0  | 0.0 | 0.0  | 0.0  | 0.0 | 4.7 | 5.9 | 0.0  | 0.0  | 0.0  |
| LEU | 0.0 | 0.0 | 1.3  | 0.0 | 0.0  | 0.0  | 0.0 | 1.0 | 1.4 | 0.0  | 0.0  | 0.0  |
| LYS | 8.8 | 3.3 | 0.0  | 0.0 | 0.0  | 2.4  | 0.0 | 0.0 | 0.0 | 0.0  | 0.0  | 0.0  |
| MET | 0.0 | 0.0 | 0.0  | 0.0 | 0.0  | 5.7  | 0.0 | 0.0 | 0.0 | 0.0  | 0.0  | 6.0  |
| PHE | 5.5 | 0.0 | 0.0  | 0.0 | 0.0  | 0.0  | 0.0 | 3.3 | 0.0 | 0.0  | 4.1  | 10.9 |
| PRO | 0.0 | 6.5 | 0.0  | 0.0 | 15.7 | 0.0  | 0.0 | 0.0 | 0.0 | 0.0  | 0.0  | 0.0  |
| SER | 0.0 | 4.3 | 3.6  | 0.0 | 3.9  | 0.0  | 0.0 | 0.0 | 0.0 | 0.0  | 0.0  | 0.0  |
| THR | 0.0 | 0.0 | 0.0  | 0.0 | 0.0  | 3.7  | 0.0 | 0.0 | 0.0 | 4.2  | 0.0  | 0.0  |
| TRP | 0.0 | 0.0 | 0.0  | 0.0 | 8.0  | 0.0  | 0.0 | 0.0 | 0.0 | 0.0  | 0.0  | 0.0  |
| TYR | 0.0 | 0.0 | 0.0  | 0.0 | 3.4  | 0.0  | 8.3 | 0.0 | 0.0 | 0.0  | 11.4 | 0.0  |
| VAL | 0.0 | 0.0 | 0.0  | 0.0 | 0.0  | 0.0  | 2.4 | 3.2 | 0.0 | 0.0  | 3.8  | 0.0  |
|     | P-3 | P-2 | P-1  | P0  | P1   | P2   | P3  | P4  | P5  | P6   | P7   | P8   |

## E.m166

|     |     |      |     |     |      |     |     |      |     |     |     |      |     |     |      |
|-----|-----|------|-----|-----|------|-----|-----|------|-----|-----|-----|------|-----|-----|------|
| ALA | 2.7 | 1.0  | 1.8 | 1.2 | 0.0  | 1.8 | 2.4 | 1.6  | 0.0 | 1.1 | 0.5 | 0.8  | 4.3 | 0.0 | 0.0  |
| ARG | 0.0 | 1.7  | 2.0 | 1.5 | 1.2  | 1.4 | 0.0 | 0.0  | 0.0 | 0.0 | 2.1 | 1.4  | 0.0 | 0.0 | 0.0  |
| ASN | 0.0 | 0.0  | 2.9 | 2.4 | 0.0  | 2.6 | 0.0 | 0.0  | 0.0 | 2.0 | 2.7 | 0.0  | 0.0 | 0.0 | 5.2  |
| ASP | 0.0 | 0.0  | 0.0 | 0.0 | 1.2  | 0.0 | 0.0 | 0.0  | 0.0 | 1.4 | 3.9 | 0.0  | 0.0 | 0.0 | 0.0  |
| CYS | 0.0 | 0.0  | 0.0 | 0.0 | 49.7 | 0.0 | 0.0 | 33.3 | 0.0 | 4.5 | 0.0 | 21.9 | 0.0 | 0.0 | 39.5 |
| GLU | 0.0 | 0.0  | 1.1 | 0.0 | 0.0  | 0.7 | 1.0 | 0.0  | 0.0 | 1.7 | 3.4 | 0.0  | 0.0 | 5.5 | 0.0  |
| GLN | 0.0 | 0.0  | 2.0 | 1.7 | 0.0  | 0.0 | 0.0 | 0.0  | 0.0 | 2.3 | 3.2 | 0.0  | 0.0 | 0.0 | 0.0  |
| GLY | 0.0 | 4.7  | 0.0 | 0.0 | 0.0  | 0.0 | 7.9 | 0.0  | 0.0 | 1.7 | 0.0 | 0.0  | 0.0 | 9.7 | 0.0  |
| HIS | 0.0 | 11.8 | 0.0 | 0.0 | 0.0  | 0.0 | 0.0 | 0.0  | 1.0 | 0.0 | 0.0 | 0.0  | 0.0 | 0.0 | 0.0  |
| ILE | 0.0 | 0.0  | 0.0 | 0.0 | 2.4  | 2.2 | 0.9 | 1.0  | 0.0 | 0.0 | 0.0 | 0.0  | 3.7 | 0.0 | 0.0  |
| LEU | 1.0 | 0.0  | 0.0 | 2.2 | 0.0  | 0.0 | 0.0 | 0.0  | 0.0 | 0.9 | 0.0 | 2.4  | 0.0 | 0.0 | 0.0  |
| LYS | 2.1 | 2.0  | 4.4 | 1.8 | 2.7  | 3.1 | 0.0 | 2.5  | 0.0 | 1.5 | 3.3 | 0.0  | 0.0 | 4.2 | 0.0  |
| MET | 0.0 | 0.0  | 0.0 | 0.0 | 3.1  | 2.7 | 0.0 | 0.0  | 0.0 | 2.4 | 0.0 | 0.0  | 8.1 | 0.0 | 5.5  |
| PHE | 0.0 | 0.0  | 0.0 | 0.0 | 0.0  | 0.0 | 0.0 | 0.0  | 0.0 | 0.0 | 0.0 | 0.0  | 0.0 | 0.0 | 0.0  |
| PRO | 0.0 | 0.0  | 0.0 | 0.0 | 0.0  | 0.0 | 0.0 | 0.0  | 0.0 | 0.0 | 0.0 | 0.0  | 0.0 | 0.0 | 0.0  |
| SER | 0.0 | 0.0  | 0.0 | 0.0 | 0.0  | 0.0 | 5.5 | 0.0  | 0.0 | 0.0 | 0.0 | 0.0  | 0.0 | 2.8 | 4.6  |
| THR | 2.1 | 0.0  | 4.4 | 2.1 | 0.0  | 1.4 | 0.0 | 0.0  | 0.0 | 3.1 | 1.7 | 2.4  | 0.0 | 0.0 | 0.0  |
| TRP | 0.0 | 0.0  | 0.0 | 0.0 | 0.0  | 0.0 | 0.0 | 0.0  | 0.0 | 0.0 | 0.0 | 0.0  | 0.0 | 0.0 | 0.0  |
| TYR | 7.4 | 0.0  | 0.0 | 2.4 | 0.0  | 0.0 | 0.0 | 5.4  | 0.0 | 0.0 | 0.0 | 0.0  | 0.0 | 0.0 | 0.0  |
| VAL | 1.8 | 1.5  | 0.0 | 1.2 | 0.0  | 2.1 | 1.0 | 0.0  | 0.0 | 0.0 | 0.0 | 1.7  | 1.3 | 0.0 | 0.0  |
|     | P-8 | P-7  | P-6 | P-5 | P-4  | P-3 | P-2 | P-1  | P0  | P1  | P2  | P3   | P4  | P5  | P6   |

## F.m80

|     |     |     |     |     |     |     |     |     |     |     |     |
|-----|-----|-----|-----|-----|-----|-----|-----|-----|-----|-----|-----|
| ALA | 1.4 | 0.0 | 1.0 | 1.6 | 0.0 | 1.4 | 0.0 | 0.7 | 0.0 | 0.7 | 1.5 |
| ARG | 0.0 | 0.0 | 0.0 | 0.0 | 0.0 | 0.0 | 0.0 | 1.5 | 0.0 | 0.0 | 0.0 |
| ASN | 0.0 | 4.6 | 0.0 | 0.0 | 0.0 | 3.0 | 4.3 | 2.7 | 0.0 | 0.0 | 0.0 |
| ASP | 0.0 | 0.0 | 0.0 | 2.3 | 0.0 | 0.0 | 4.3 | 0.0 | 0.0 | 1.9 | 2.9 |
| CYS | 0.0 | 0.0 | 0.0 | 0.0 | 0.0 | 0.0 | 0.0 | 0.0 | 0.0 | 6.0 | 0.0 |
| GLU | 0.0 | 0.0 | 1.2 | 0.0 | 0.0 | 0.0 | 1.2 | 0.0 | 0.0 | 1.1 | 0.0 |
| GLN | 0.0 | 0.0 | 0.0 | 0.0 | 0.0 | 0.0 | 2.1 | 1.8 | 0.0 | 0.0 | 0.0 |
| GLY | 3.5 | 0.0 | 0.0 | 2.7 | 0.0 | 0.0 | 0.0 | 2.0 | 0.0 | 0.0 | 8.9 |
| HIS | 0.0 | 0.0 | 0.0 | 5.2 | 0.0 | 7.3 | 3.4 | 0.0 | 1.0 | 0.0 | 4.1 |
| ILE | 0.0 | 2.8 | 0.0 | 0.0 | 1.9 | 0.0 | 0.0 | 0.0 | 0.0 | 2.5 | 0.0 |
| LEU | 0.0 | 2.4 | 1.9 | 0.0 | 5.2 | 0.0 | 0.6 | 1.3 | 0.0 | 0.6 | 0.0 |
| LYS | 0.0 | 0.0 | 7.4 | 2.4 | 0.0 | 0.0 | 1.7 | 1.7 | 0.0 | 2.0 | 0.0 |
| MET | 7.4 | 0.0 | 0.0 | 0.0 | 0.0 | 0.0 | 0.0 | 0.0 | 0.0 | 0.0 | 0.0 |
| PHE | 0.0 | 3.3 | 0.0 | 0.0 | 3.3 | 2.3 | 0.0 | 5.7 | 0.0 | 1.8 | 2.2 |
| PRO | 0.0 | 0.0 | 0.0 | 0.0 | 0.0 | 0.0 | 3.3 | 0.0 | 0.0 | 0.0 | 0.0 |
| SER | 3.3 | 0.0 | 2.4 | 3.1 | 2.2 | 5.6 | 0.0 | 1.8 | 0.0 | 0.0 | 0.0 |
| THR | 3.1 | 0.0 | 0.0 | 2.8 | 0.0 | 0.0 | 0.0 | 0.0 | 0.0 | 2.1 | 5.2 |
| TRP | 0.0 | 9.8 | 0.0 | 0.0 | 0.0 | 0.0 | 0.0 | 0.0 | 0.0 | 0.0 | 0.0 |
| TYR | 0.0 | 0.0 | 3.4 | 0.0 | 0.0 | 0.0 | 2.2 | 0.0 | 0.0 | 2.0 | 0.0 |
| VAL | 2.7 | 2.0 | 0.0 | 1.6 | 1.8 | 2.5 | 2.3 | 0.0 | 0.0 | 1.2 | 1.3 |
|     | P-8 | P-7 | P-6 | P-5 | P-4 | P-3 | P-2 | P-1 | P0  | P1  | P2  |
